# Supplementary material for: Analysis of Dynamics and Diversity of Microbial Community during Production of Germinated Brown Rice
Source: MDPI journal article supplement (doi:10.3390/foods12040755), 2023-02-09
Supplement: s1 [file s1]

Article

# Analysis of Dynamics and Diversity of Microbial Community during Production of Germinated Brown Rice

Gaoji Yang <sup>1</sup>, Juanjuan Xu <sup>1</sup>, Yuanmei Xu <sup>1</sup>, Rui Li <sup>1</sup> and Shaojin Wang <sup>1,2,\*</sup>

## Supplementary Material

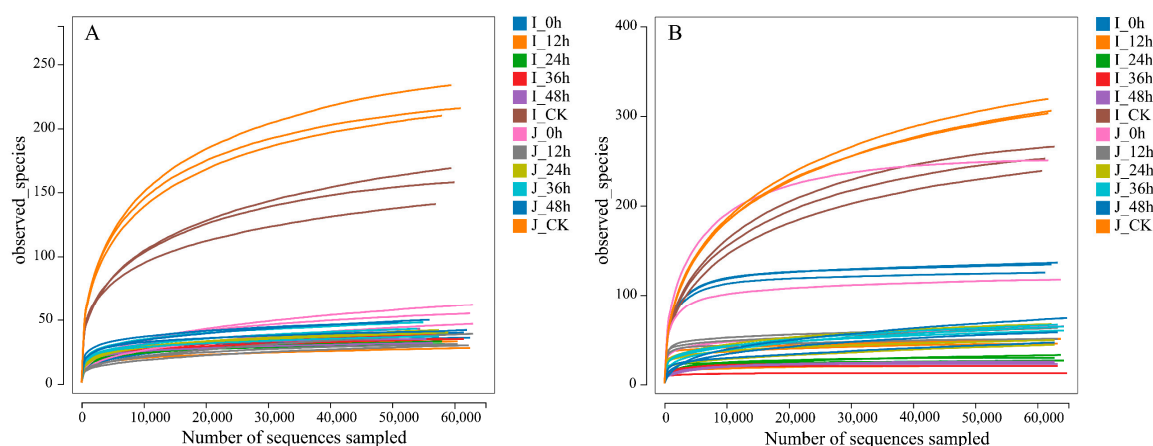

**Figure S1.** Rarefaction curves of bacterial (A) and fungal (B) populations in the germination process of BR samples. Control: untreated BR grains were used as the ungerminated samples. Samples germinated for 0 h represent the soaked BR. Labels ‘J’ and ‘I’ in legend refer to HLJ2 and HN samples, respectively.

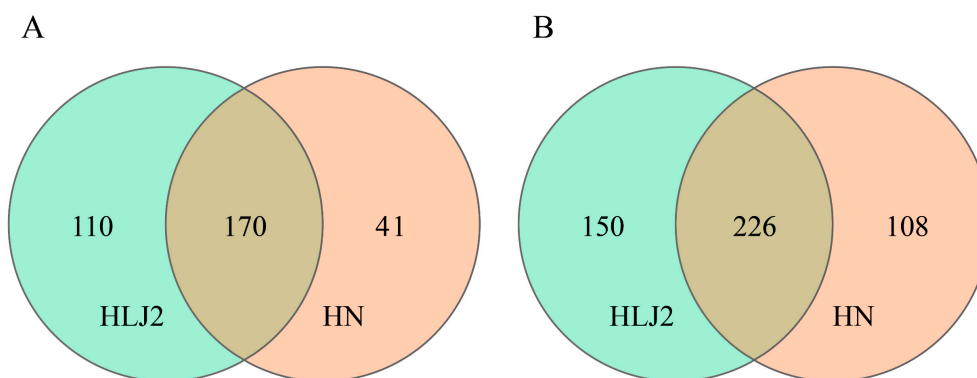

**Figure S2.** Venn diagrams for numbers of shared and unique genera of ungerminated BR samples in bacteria (A) and fungi (B).

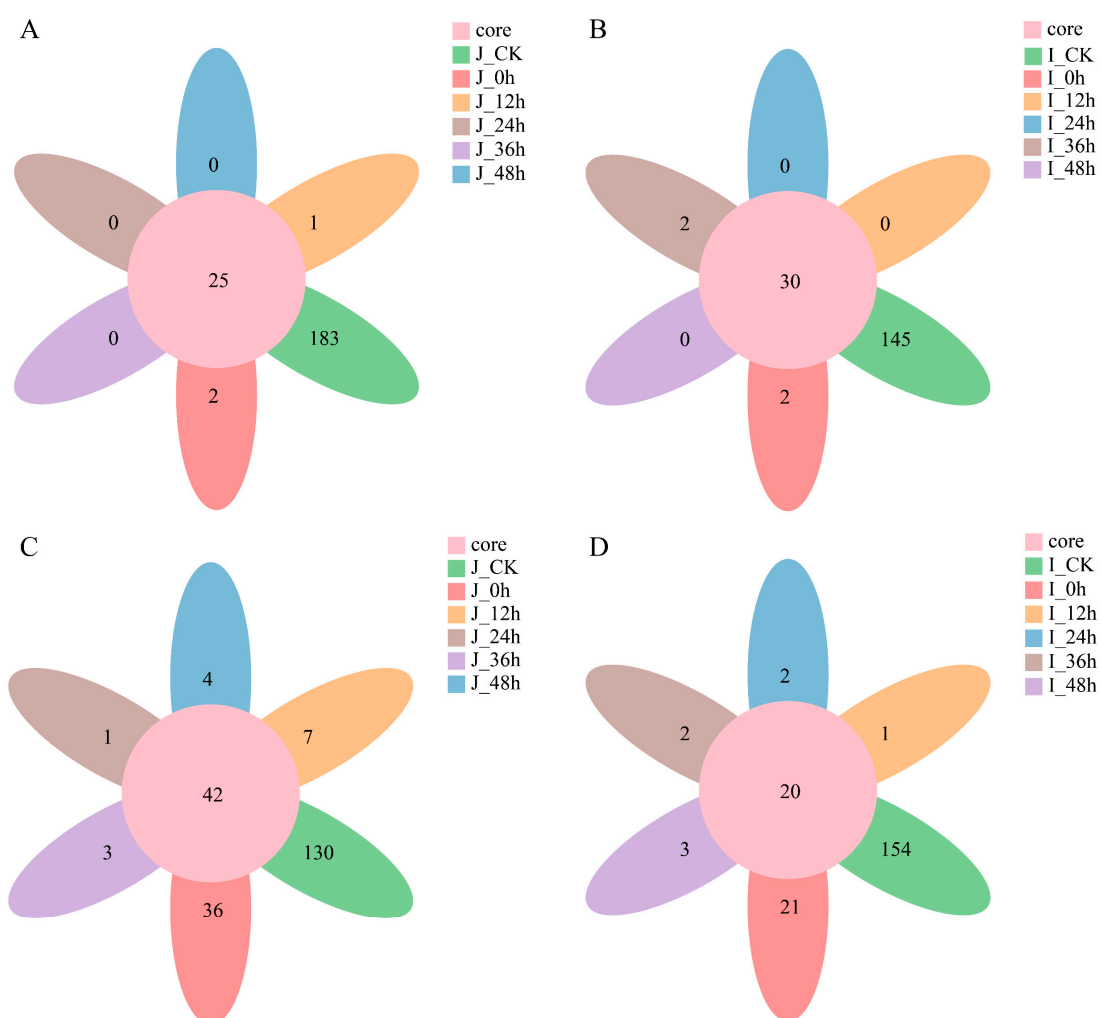

**Figure S3.** Flower diagrams for numbers of shared and unique genera of BR samples in bacteria (A,B) and fungi (C,D) at various germination times; (A,C) HLJ2; (B,D) HN. Labels 'J' and 'I' in legend refer to HLJ2 and HN samples, respectively.

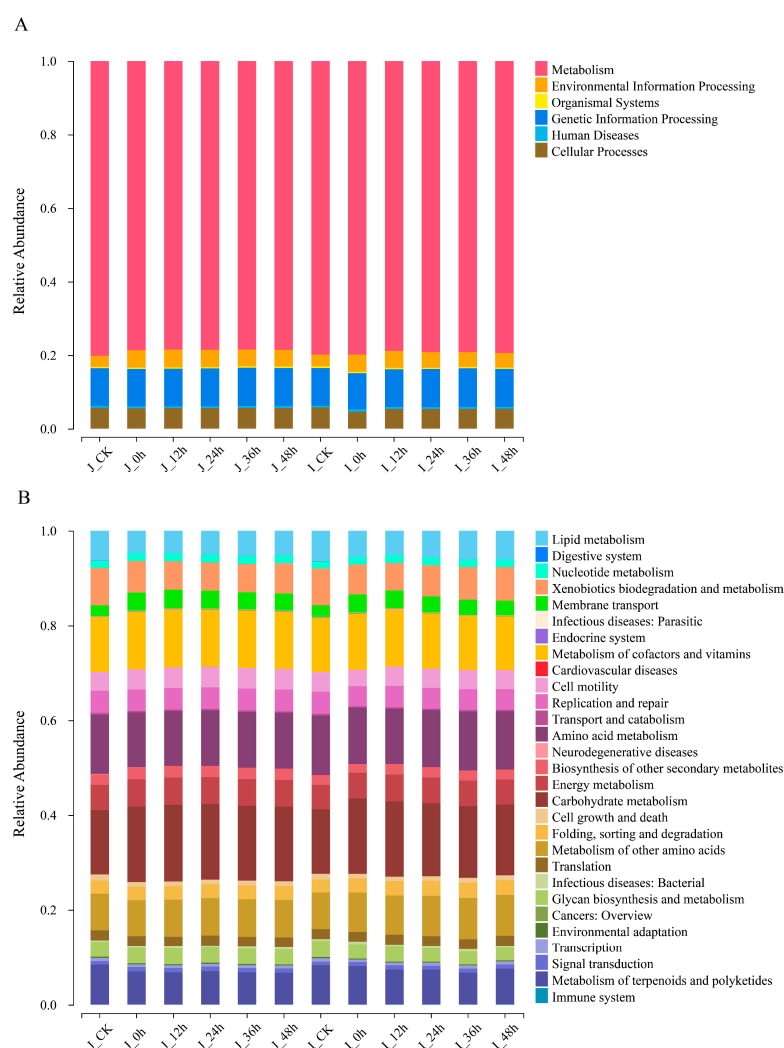

**Figure S4.** Relative abundance of functional properties of KEGG levels 1 (A) and 2 (B) based on the 16S rRNA gene sequences using PICRUST. Labels 'J' and 'T' in legend refer to HLJ2 and HN samples, respectively.

**Table S1.** Richness and diversity indices for bacteria of BR samples during germination.

| Samples | Germination Time (h) | Effective Tags | Sobs                | Chao                 | ACE                  | Shannon             | Simpson               | Coverage (%) |
|---------|----------------------|----------------|---------------------|----------------------|----------------------|---------------------|-----------------------|--------------|
| HLJ2    | Control              | 59,826 ± 1678  | 220.00 ± 12.49 A; a | 235.89 ± 14.86 A; a  | 240.14 ± 17.27 A; a  | 3.14 ± 0.03 A; a    | 0.068 ± 0.002 E; b    | 99.95        |
|         | 0                    | 63,221 ± 286   | 54.67 ± 7.51 B; b   | 69.32 ± 15.26 C; b   | 81.32 ± 16.30 C; b   | 0.88 ± 0.10 AB; c   | 0.637 ± 0.042 E; a    | 99.98        |
|         | 12                   | 62,038 ± 1123  | 33.33 ± 4.93 D; c   | 42.12 ± 10.87 DEF; c | 51.81 ± 18.03 CDE; b | 1.00 ± 0.23 ABC; bc | 0.548 ± 0.125 E; a    | 99.99        |
|         | 24                   | 58,154 ± 1086  | 40.67 ± 0.58 D; c   | 56.03 ± 8.64 DEF; c  | 63.75 ± 13.24 EF; b  | 1.32 ± 0.25 BCD; bc | 0.451 ± 0.098 CDE; a  | 99.98        |
|         | 36                   | 55,790 ± 1581  | 42.67 ± 5.51 D; bc  | 49.37 ± 10.32 CD; bc | 60.37 ± 11.56 DE; b  | 1.46 ± 0.25 DE; b   | 0.423 ± 0.137 ABCD; a | 99.99        |
|         | 48                   | 55,406 ± 3897  | 46.33 ± 4.73 D; bc  | 51.37 ± 6.55 DE; bc  | 56.40 ± 5.00 CD; b   | 1.50 ± 0.42 F; b    | 0.437 ± 0.166 ABC; a  | 99.99        |
| HN      | Control              | 58,992 ± 1548  | 156.00 ± 14.11 B; a | 171.09 ± 15.67 B; a  | 178.02 ± 18.63 B; a  | 3.01 ± 0.11 A; a    | 0.084 ± 0.011 E; c    | 99.96        |
|         | 0                    | 62,304 ± 603   | 39.33 ± 3.06 C; b   | 48.73 ± 9.34 C; b    | 61.03 ± 19.34 CD; b  | 0.70 ± 0.01 A; c    | 0.713 ± 0.002 E; a    | 99.98        |
|         | 12                   | 61,810 ± 992   | 32.00 ± 3.61 D; b   | 34.08 ± 4.26 EF; b   | 44.87 ± 9.25 EF; b   | 1.48 ± 0.28 CD; b   | 0.332 ± 0.120 DE; b   | 99.99        |
|         | 24                   | 58,295 ± 601   | 32.33 ± 2.00 D; b   | 37.58 ± 5.66 EF; b   | 38.08 ± 10.08 F; b   | 1.44 ± 0.30 F; b    | 0.343 ± 0.145 A; b    | 99.98        |
|         | 36                   | 59,158 ± 2437  | 36.33 ± 2.31 D; b   | 41.50 ± 8.26 F; b    | 43.36 ± 6.67 F; b    | 1.56 ± 0.08 F; b    | 0.283 ± 0.026 AB; b   | 99.99        |
|         | 48                   | 55,832 ± 1095  | 36.67 ± 5.69 D; b   | 41.11 ± 9.44 F; b    | 44.33 ± 7.37 F; b    | 1.61 ± 0.18 DE; b   | 0.298 ± 0.093 BCDE; b | 99.99        |

Different upper- and lower-case letters in the same column indicate that means were significantly different between two samples and different germination stage for each cultivar, respectively, at  $p = 0.05$ .

**Table S2.** Richness and diversity indices for fungi of BR samples during germination.

| Samples | Germination Time (h) | Effective Tags | Sobs                | Chao                  | ACE                    | Shannon             | Simpson                | Coverage (%) |
|---------|----------------------|----------------|---------------------|-----------------------|------------------------|---------------------|------------------------|--------------|
| HLJ2    | Control              | 61,779 ± 433   | 309.33 ± 8.50 A; a  | 354.71 ± 10.75 A; a   | 362.58 ± 8.78 A; a     | 2.95 ± 0.01 A; a    | 0.095 ± 0.001 E; c     | 99.90        |
|         | 0                    | 63,339 ± 1191  | 144.00 ± 95.41 C; b | 151.94 ± 87.86 C; b   | 174.47 ± 68.19 C; b    | 2.64 ± 0.59 AB; ab  | 0.180 ± 0.095 E; bc    | 99.98        |
|         | 12                   | 63,112 ± 192   | 59.00 ± 7.81 D; c   | 73.64 ± 23.25 DEF; bc | 110.08 ± 74.65 CDE; bc | 2.53 ± 0.37 ABC; ab | 0.166 ± 0.092 E; bc    | 99.99        |
|         | 24                   | 62,656 ± 206   | 53.33 ± 12.10 D; c  | 61.17 ± 12.35 DEF; c  | 70.94 ± 19.29 EF; c    | 1.93 ± 0.81 BCD; bc | 0.308 ± 0.279 CDE; abc | 99.98        |
|         | 36                   | 64,065 ± 695   | 63.67 ± 3.51 D; c   | 109.17 ± 46.78 CD; bc | 97.29 ± 10.62 DE; bc   | 1.32 ± 0.52 DE; cd  | 0.465 ± 0.229 ABCD; ab | 99.97        |
|         | 48                   | 63,499 ± 1015  | 59.33 ± 14.05 D; c  | 90.48 ± 22.96 DE; bc  | 140.34 ± 59.61 CD; bc  | 0.92 ± 0.33 F; d    | 0.564 ± 0.168 ABC; a   | 99.97        |
| HN      | Control              | 61,555 ± 988   | 252.00 ± 13.00 B; a | 275.54 ± 6.13 B; a    | 281.34 ± 4.92 B; a     | 3.04 ± 0.03 A; a    | 0.095 ± 0.002 E; c     | 99.93        |
|         | 0                    | 62,354 ± 912   | 132.00 ± 6.24 C; b  | 148.44 ± 24.69 C; b   | 144.53 ± 19.58 CD; b   | 3.06 ± 0.02 A; a    | 0.091 ± 0.001 E; c     | 99.99        |
|         | 12                   | 63,263 ± 663   | 38.67 ± 15.50 D; c  | 42.28 ± 19.51 EF; bc  | 49.51 ± 28.70 EF; bc   | 1.87 ± 0.40 CD; b   | 0.291 ± 0.068 DE; b    | 99.99        |
|         | 24                   | 63,617 ± 767   | 30.00 ± 2.00 D; cd  | 34.58 ± 4.13 EF; c    | 26.20 ± 24.36 F; c     | 0.85 ± 0.34 F; c    | 0.614 ± 0.190 A; a     | 99.99        |
|         | 36                   | 63,717 ± 1134  | 19.67 ± 5.13 D; d   | 19.67 ± 5.13 F; bc    | 19.87 ± 4.80 F; bc     | 0.92 ± 0.35 F; c    | 0.587 ± 0.148 AB; a    | 100.00       |
|         | 48                   | 62,761 ± 272   | 25.00 ± 1.00 D; cd  | 25.33 ± 0.58 F; bc    | 25.55 ± 0.80 F; bc     | 1.29 ± 0.18 DE; c   | 0.339 ± 0.068 BCDE; b  | 100.00       |

One-way ANOVA was also applied as in Table S2. Different upper- and lower-case letters in the same column indicated that means were significantly different between the two samples and different germination stage for each cultivar, respectively, at  $p = 0.05$ .
